# Supplementary material for: Genetic Dissection of the Canq1 Locus Governing Variation in Extent of the Collateral Circulation
Source: PubMed Central journal article supplement (PMC3295810; doi:10.1371/journal.pone.0031910), 2012-03-06

Figure S6. EMMA mapping using 21 strains. Mapping allowed no SNPs with missing genotypes.

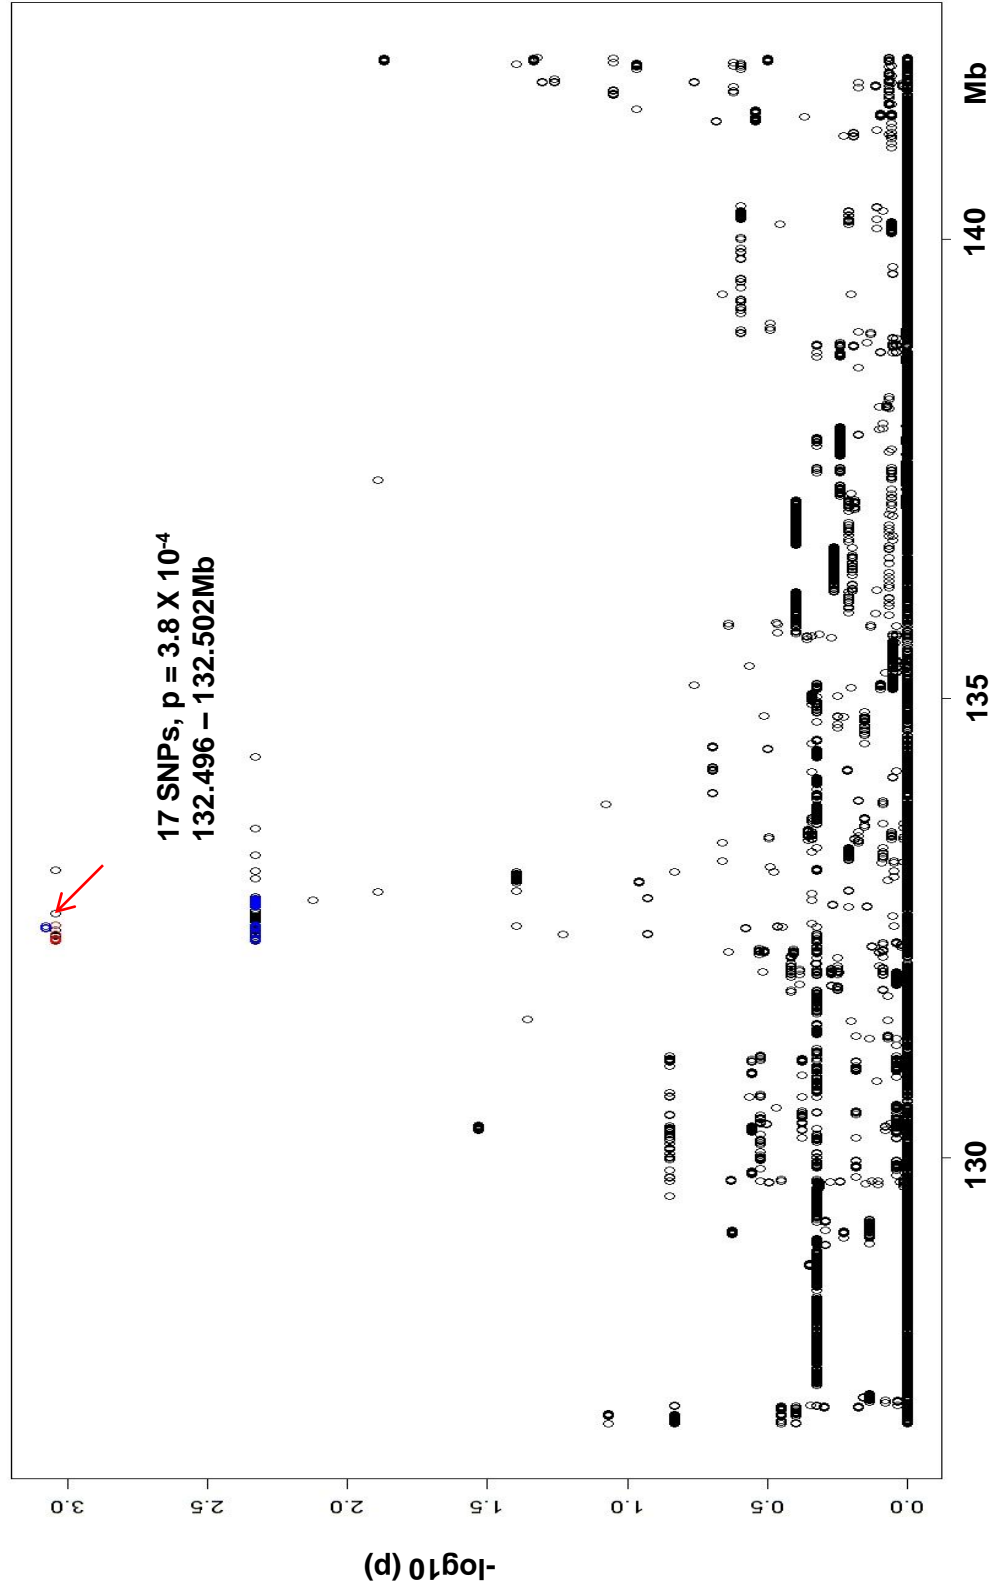

Supplement: pone.0031910.s006.pdf [file pone.0031910.s006.pdf]
