# Supplementary material for: Genetic Dissection of the Canq1 Locus Governing Variation in Extent of the Collateral Circulation
Source: PubMed Central journal article supplement (PMC3295810; doi:10.1371/journal.pone.0031910), 2012-03-06
Supplement: pone.0031910.s009.pdf [file pone.0031910.s009.pdf]

**Online table I. Primers for qRT-PCR**

| <b>Gene</b>   | <b>Sense</b>                       | <b>Antisense</b>                   |
|---------------|------------------------------------|------------------------------------|
| <i>Angpt2</i> | 5'-AGC AGA TTT TGG ATC ACA CCAG    | 5'-GCT CCT TCA TGG ACT GTA GCTG-3' |
| <i>Klf4</i>   | 5'-TGC CAG ACC AGA TGC AGT CAC-3', | 5'-GTA GTG CCT GGT CAG TTC ATC- 3' |
| <i>Tgfb1</i>  | 5'-GCT ACC ATG CCA ACT TCT GTCT-3' | 5'-CCT ACC ACC CCA GCC TCTG-3'     |
